# Supplementary material for: 2D/1D MXene/MWCNT Hybrid Membrane-Based Evaporator for Solar Desalination
Source: MDPI journal article supplement (doi:10.3390/ma15030929), 2022-01-25
Supplement: s1 [file s1]

Supplementary

## 2D/1D MXene/MWCNT Hybrid Membrane-Based Evaporator for Solar Desalination

Yawei Yang \*, Yan Han, Jianqiu Zhao and Wenxiu Que \*

### Calculation of the solar-to-vapor conversion efficiency

The solar-to-vapor conversion efficiency ( $\eta$ ) is estimated by

$$\eta = (m_{\text{light}} - m_{\text{dark}})h_{\text{LV}}/I \quad (\text{S1})$$

$$h_{\text{LV}} = Q + L_v \quad (\text{S2})$$

$$L_v = 1.91846 \times 10^3 \times [T_i/(T_i - 33.91)]^2 \quad (\text{S3})$$

$$Q = C (T_i - T_s) \quad (\text{S4})$$

where  $m_{\text{light}}$  and  $m_{\text{dark}}$  is the evaporation rate under light and dark conditions,  $h_{\text{LV}}$  is the total enthalpy of sensible heat ( $Q$ , J/g) and liquid-vapor phase change ( $L_v$ , J/g),  $I$  is power density of solar illumination (1 kW/m<sup>2</sup>), and  $C$  is the specific heat of water (4.2 J/g K).  $L_v$  is dependent on the water/air interface temperature ( $T_i$ ).  $Q$  is determined by the temperature difference between the water/air interface ( $T_i$ ) and source water ( $T_s$ ).

In this case,  $T_s = 25$  °C.  $T_i = 36$  and  $38$  °C for  $\text{Ti}_3\text{C}_2$  and  $\text{Ti}_3\text{C}_2$ -MWCNT membranes, respectively. Thus,

$$h_{\text{LV}} = L_v + Q = 2416.8 + 46.2 = 2463.0 \text{ J/g for } \text{Ti}_3\text{C}_2 \text{ membrane}$$

$$h_{\text{LV}} = L_v + Q = 2420.6 + 54.6 = 2475.2 \text{ J/g for } \text{Ti}_3\text{C}_2\text{-MWCNT membrane}$$

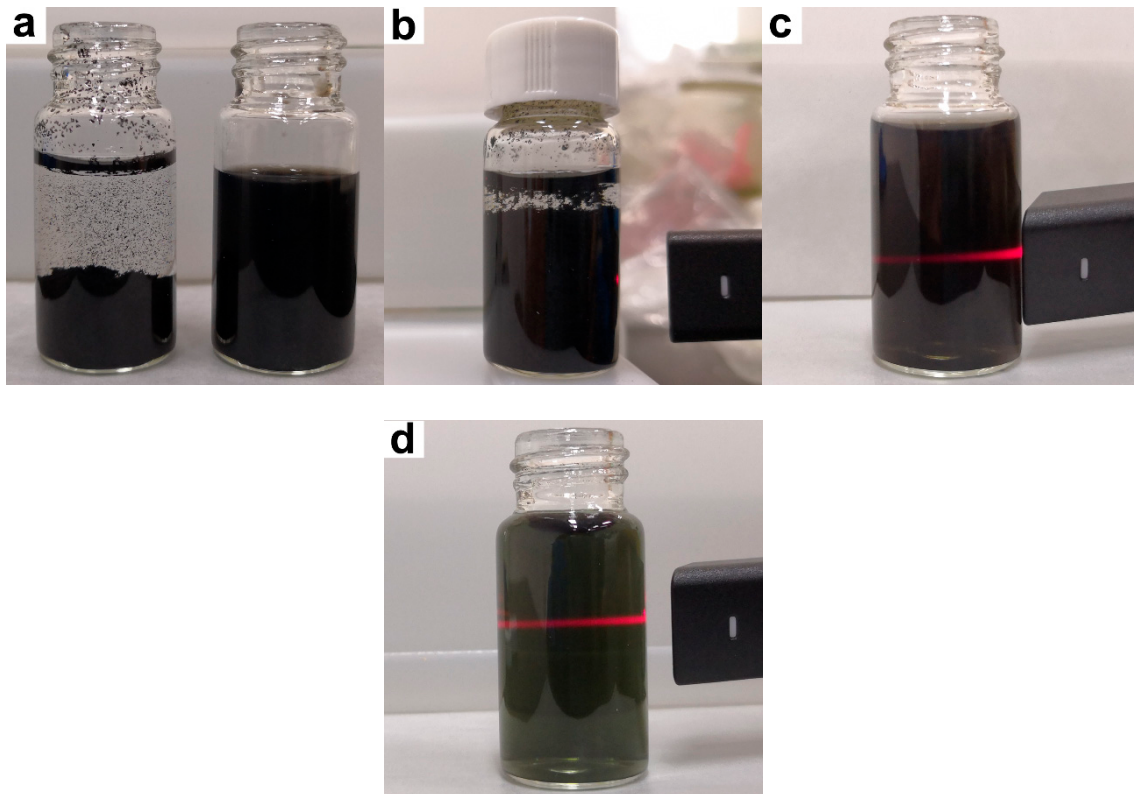

**Figure S1.** Photographs of (a) the original MWCNT after 3 h of ultrasonic dispersion (left) and well-dispersed acidified MWCNT suspension (right), (b) no Tyndall effect in original MWCNT, (c) Tyndall effect in MWCNT suspension, and (d) Tyndall effect in  $\text{Ti}_3\text{C}_2$  nanosheets suspension.

Figure S1c,d show that the acidified MWCNT and  $\text{Ti}_3\text{C}_2$  nanosheets suspensions are homogeneous colloidal dispersions with particle size  $<100$  nm.

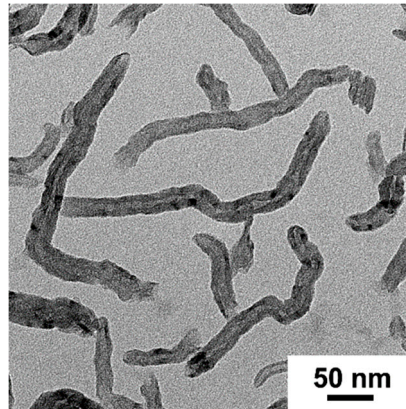

**Figure S2.** TEM image of the acidified MWCNT.

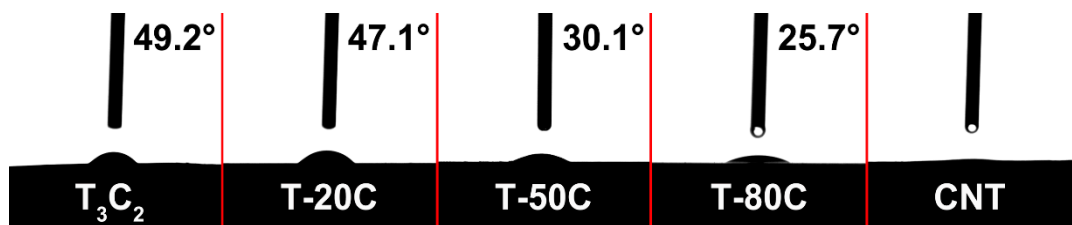

**Figure S3.** Contact angles of the Ti<sub>3</sub>C<sub>2</sub>-MWCNT membranes.

The acidified MWCNT (marked as CNT) shows great hydrophilicity mainly due to the adsorbed hydroxyl and carboxyl groups on its surface during acidification. Figure S3 shows that all the Ti<sub>3</sub>C<sub>2</sub>-MWCNT membranes are hydrophilic, and the hydrophilicity improves with the increasing MWCNT content.

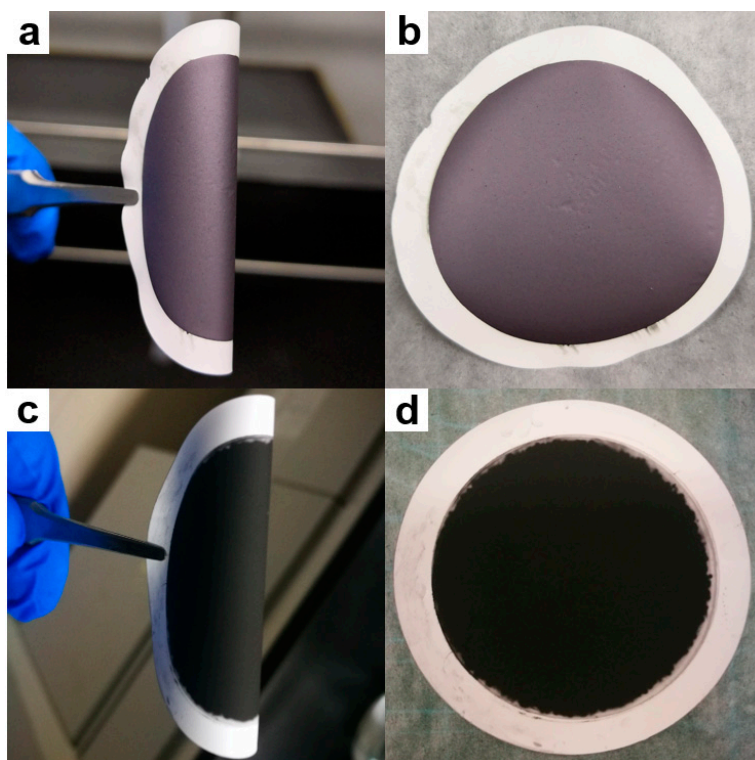

**Figure S4.** Light reflection of the (a, b) pristine  $\text{Ti}_3\text{C}_2$  and (c, d) T-50C membranes.

Figure S4a,b show a strong light reflection in the 2D  $\text{Ti}_3\text{C}_2$  membrane, while Figure 4S (c) and (d) exhibit a significantly reduced light reflection in the T-50C membrane.

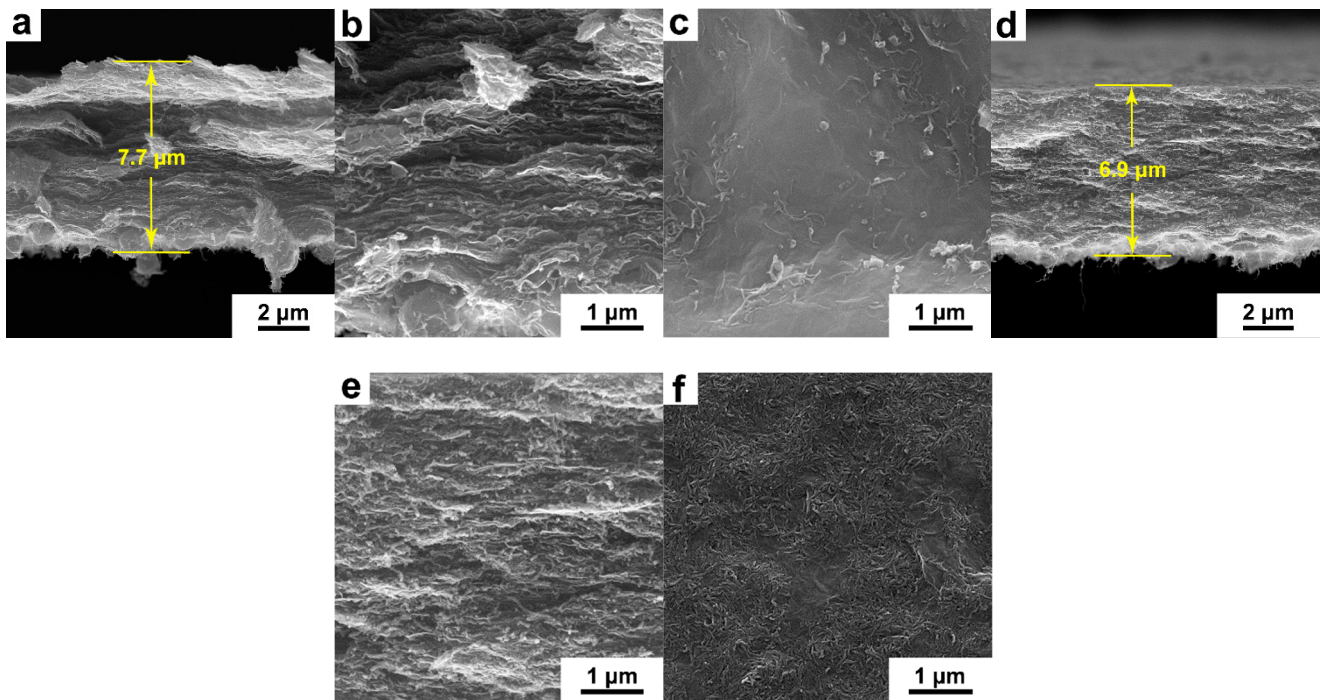

**Figure S5.** (a, b)/(d, e) Cross-section and (c)/(f) top-view SEM images of the T-20C/T-80C membranes.

Figure S5a,d show that the thickness of T-20C and T-80C are ~7.7 and 6.9 μm, respectively.

Table S1. Solar desalination performance of various 2D materials-based photothermal membranes.

| Sample                                                                                                 | Evaporation rate<br>(kg/m <sup>2</sup> h) | Efficiency (%) | Sun  | Salt rejection<br>rate (%) | Ref.                                                  |
|--------------------------------------------------------------------------------------------------------|-------------------------------------------|----------------|------|----------------------------|-------------------------------------------------------|
| Ti <sub>3</sub> C <sub>2</sub> membrane                                                                | N/A                                       | 84             | 1.0  | N/A                        | <i>ACS Nano</i> 2017, 11, 3752                        |
| Ti <sub>3</sub> C <sub>2</sub> membrane/<br>PFDTMS-modified Ti <sub>3</sub> C <sub>2</sub><br>membrane | 1.41/<br>1.31                             | 74/<br>71      | 1.0  | >99.5                      | <i>J. Mater. Chem. A</i> 2018, 6,<br>16196            |
| 2D/0D Ti <sub>3</sub> C <sub>2</sub> /Au membrane                                                      | 2.66                                      | 83.63          | 2.0  | N/A                        | <i>ACS Sustainable Chem. Eng.</i><br>2021, 9, 11372   |
| 2D/2D Ti <sub>3</sub> C <sub>2</sub> /MoS <sub>2</sub> mem-<br>brane                                   | 1.36                                      | 87.2           | 1.0  | ~99.9                      | <i>J. Colloid Interface Sci.</i> 2021,<br>584, 125    |
| 2D/3D Ti <sub>3</sub> C <sub>2</sub> /Cu <sub>3</sub> BiS <sub>3</sub> mem-<br>brane                   | 1.32                                      | 90             | 1.0  | >99.9                      | <i>ACS Appl. Mater. Interfaces</i><br>2021, 13, 16246 |
| 2D/1D rGO/MWCNT mem-<br>brane                                                                          | 1.22                                      | 80.4           | 1.0  | N/A                        | <i>J. Mater. Chem. A</i> 2018, 6, 963                 |
| rGO membrane                                                                                           | 0.7163                                    | 49.0           | 1.0  | >99.8                      | <i>Desalination</i> 2018, 442, 1                      |
| Ce-MoS <sub>2</sub> membrane                                                                           | 0.81                                      | 75.6           | 0.76 | N/A                        | <i>Nano Energy</i> 2018, 53, 949                      |
| GO membrane                                                                                            | 1.45                                      | 80             | 1.0  | >99.9                      | <i>PNAS</i> 2016, 113, 139523                         |
| MoS <sub>2</sub> membrane                                                                              | 2.50                                      | 89.6           | 1.0  | >99.0                      | <i>Adv. Mater.</i> 2020, 32, 2001544                  |
| 2D layered BiInSe <sub>3</sub> mem-<br>brane                                                           | 1.1                                       | N/A            | 1.0  | >99.9                      | <i>J. Mater. Chem. A</i> 2018, 6,<br>3869             |
| 2D/2D Ti <sub>3</sub> C <sub>2</sub> /MWCNT mem-<br>brane                                              | 1.55                                      | 90.8           | 1.0  | >99.5                      | <b>This work</b>                                      |
